1 *Type of the Paper (Article, Review, Communication, etc.)*

# 2 **Whole-genome sequencing and single acute toxicity of heavy** 3 **metal to *Photobacterium kishitanii* FJ21**

4 **Shuzheng Yin , Zilong Yi, Jia Liu, Gang Liu, and Jun Fang\***

5 Hunan Provincial Engineering Research Center of Applied Microbial Resources Development for Livestock  
6 and Poultry, College of Bioscience and Biotechnology, Hunan Agricultural University, Changsha 410128,  
7 China;

8 \* Correspondence: fangjun1973@hunau.edu.cn (J.F.)

9 **Abstract:** In this study, the growth morphology of FJ21 strain was observed, and its 16S rRNA and  
10 whole genome were sequenced. Then, related software was used to make genome assembly, gene  
11 structure and function annotation, genome phylogenetic tree analysis, genome collinearity  
12 analysis and prediction of secondary metabolic gene cluster analysis. Finally, the single acute  
13 toxicity of five heavy metals to FJ21 strain was detected. There were *luxC*, *luxD*, *luxA*, *luxB*, *luxF*,  
14 *luxE* and *luxG* genes in FJ21, and the protein encoded by *lux* operon had certain hydrophilicity.  
15 The genome of this strain FJ21 contains a chromosome with a total length of 4853277bp and a GC  
16 content of 39.23%. The genome of FJ21 was compared with that of *Photobacterium kishitanii*  
17 ATCCBAA-1194, *Photobacterium phosphoreum* JCM21184, *Photobacterium aquimaris* LC2-065,  
18 *Photobacterium malacitanum* CECT9190, and *Photobacterium carnosum* TMW 2.2021. The average  
19 nucleotide identity(ANI), tetra nucleotide signatures (Tetra), comparative genome, and  
20 phylogenetic analysis proposed that FJ21 is a strain of *Photobacterium kishitanii*. In the acute toxicity  
21 test, the toxicity of heavy metals to the strain FJ21 is  $Pb(NO_3)_2 > ZnSO_4 \cdot 7H_2O > CdCl_2 \cdot 2.5H_2O >$   
22  $CuSO_4 \cdot 5H_2O > K_2Cr_2O_7$ .

23 **Keywords:** luminescent bacteria; whole-genome sequencing; comparative analysis; phylogenetic  
24 analysis; *lux* operon; the acute toxicity test

25 **Publisher's Note:** MDPI stays neutral with regard to jurisdictional claims in published maps and institutional affiliations.

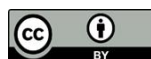

26 **Copyright:** © 2021 by the authors.  
27 Submitted for possible open access  
28 publication under the terms and  
29 conditions of the Creative Commons  
30 Attribution (CC BY) license  
31 (<https://creativecommons.org/licenses/by/4.0/>).

## 1. Introduction

Luminescent bacteria are a group of Gram-negative bacteria that can emit blue-green fluorescence under normal conditions, and live in the marine environment mainly in the form of free organisms or parasites. The bioluminescence of luminescent bacteria is regulated by the enzyme-catalyzed reaction encoded by the *lux* operon. The *luxA* and *luxB* genes encode the  $\alpha$  and  $\beta$  subunits of luciferase, respectively. *luxC*, *luxD*, and *luxE* constitute the fatty acid reductase complex, responsible for the synthesis of long Aldehyde substrate, *luxG* encodes flavin reductase[1]. Conserved genes *luxC*, *luxD*, *luxA*, *luxB*, *luxE*, and *luxG* exist in all luminescent bacteria that have been discovered[2], in addition, there are other genes such as *luxI*, *luxR*, and *luxF*[3]. Although luminescent bacteria have the same *lux* operon, these bacteria show great differences in characteristics such as growth behavior, luminescence intensity, or bioluminescence regulation[4]. The luminescence process of luminescent bacteria is oxidized FMNH<sub>2</sub> and RCHO to FMN and RCOOH under the catalysis of intracellular specific luciferase and the participation of molecular oxygen, and at the same time release blue-green light. The luminescence reaction is as follows:

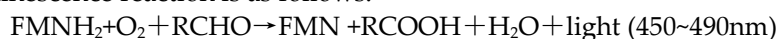

Luminescent bacteria can not only act as biosensors[5] but also produce antibacterial compounds[6], lipase[7], asparagine[8], and esterase[9]. Due to the luminescent bacteria method has the advantages of high sensitivity, simple processing,

46 rapid response, and real-time monitoring, it has been widely used in the monitoring of  
47 water toxicity and environmental pollutants[10], and the acute and chronic toxicity tests  
48 of heavy metal mixtures[11]. At present, the luminescent bacteria commonly used in  
49 water quality and environmental monitoring are *Photobacterium phosphoreum*, *Vibrio*  
50 *fischeri*, and *Vibrio Qinghaiensis*[12]. The bright luminescence is usually used in the  
51 national standard GB/T15441-1995 for the determination of acute toxicity of water  
52 quality. The basic principle of luminescent bacteria for acute toxicity detection is that the  
53 luminescence process is easily affected. As long as the respiration or physiological  
54 process of bacteria is disturbed, the luminescence intensity of the bacteria will  
55 change[13]. In recent years, with the development of high-throughput sequencing  
56 technology, many microorganisms have completed genome sequencing. Whole-genome  
57 sequencing is an important foundation of microbial molecular mechanism research and  
58 development.

59 In the study, 16S rRNA, genome phylogenetic tree analyses, comparative genomics,  
60 average nucleotide identity (ANI), and tetra nucleotide signatures (Tetra) were used to  
61 clarify the strain FJ21 to *Photobacterium kishitanii*. In addition, the single acute toxicity of  
62 heavy metals to strain FJ21 was detected, which provided some data support for  
63 ecological risk assessment of heavy metal pollution.

## 64 2. Materials and Methods

### 65 2.1. The growth morphology, 16S rRNA and lux operator analysis

66 Beef extract, tryptone, sodium chloride, potassium dihydrogen phosphate,  
67 disodium hydrogen phosphate, glycerol, and agar. After the glycerol-preserved strain  
68 was cultured at 25°C for 24h, its morphological characteristics (size, shape, transparency,  
69 color, etc.) were observed.

70 Bacterial 16S rRNA universal primer was selected, and the PCR products were sent  
71 to Sangong Biotech (Shanghai) Co., Ltd. for sequencing, and the sequencing results were  
72 blast analyzed in the GenBank database. At the same time, the phylogenetic tree was  
73 constructed with mega-x software.

74 Prediction of protein secondary structure by protein analysis online software  
75 SWISS-MODEL.

### 76 2.2. Genome Sequencing and Assembly

77 Nanopore sequencing technology[14] was used to complete the genome scanning  
78 and sequencing of the strain. Firstly, high-quality DNA was extracted with a Qiagen kit,  
79 and an ID library was constructed. The DNA was sequenced by single molecule  
80 using Oxford Nanopore Technology sequencing instrument PromethION to obtain the  
81 original sequencing data. After quality control of the obtained sequencing data, the  
82 whole genome scanning of the strain was completed by bioinformatics analysis.

83 Assembly: the three-generation data after quality control were assembled with  
84 flye(parameter : --plasmids --nano-raw), corrected with racon(parameter : default)  
85 combined with three-generation sequencing data, and corrected with pilon[15] or  
86 NextPolish[16] (parameter : default) combined with two-generation sequencing data.  
87 The corrected genome uses its script to detect whether the loop is formed. After  
88 removing redundant loops, the origin of the sequence is moved to the replication  
89 initiation site of the genome by the circulator[17] (parameter : fixstart), to obtain the  
90 final genome sequence.

### 91 2.3. Genome Structure and Function Annotation

92 Genome structure prediction includes coding gene prediction, non-coding gene  
93 prediction, CRISPR prediction, and gene island prediction. The coding gene was  
94 predicted by prodigal[18] (parameter : -p None -g 11), and the complete CDS was

retained. In the prediction of non-coding genes, RNAmmer[19] (parameter: -kingdom bac) and tRNAscan-SE2.0[20] (parameter: -B -I -m lsu,ssu,tsu) software were used to predict rRNA and tRNA in the genome, respectively. Other non-coding RNAs (ncRNAs) were predicted by the Infernal 1.1 [21] (parameter: --cut\_ga --rfam --nohmmonly) search Pfam 13.0 database [22], and the predicted length was greater than 80 % of the sequence length in the database. CRISPR(parameter : default) was predicted by minced, and gene island was predicted by Islander[23] (parameter r: default).

After extracting the genome-coded proteins, InterProScan 5[24] was used for annotation, and the annotation information of TIGRFAMs[25], Pfam[26], and GO[27]databases were extracted. Blastp was used to compare the encoded proteins to KEGG[28], Refseq[29], and COG[30] databases, and the best results with a coverage of more than 30 % were retained as annotation results. The interaction genes between pathogen and host were annotated by the PHI database, and the antibiotic resistance genes were annotated by CARD database.

#### 2.4. Phylogenetic tree Analysis and Sequence-based method for species identification

MEGA7.0 software was used to analyze the strain FJ21 and construct a phylogenetic tree by the Neighbor-Joining method.

The According to the recommended cut-off values for species determination (<95% for ANIb/ANI<sub>m</sub> and <0.989 for Tetra) [31,32], the calculation of average nucleotide identity based on BLAST(ANIb)/MUMmer(ANI<sub>m</sub>) and the correlation indexes of tetra nucleotide signatures (Tetra) were conducted using JspeciesWS (<http://jspecies.ribohost.com/jspeciesws/#Analyse>) [33,34].

#### 2.5. Genome collinearity analysis

The whole-genome sequencing of strain FJ21 was analyzed by collinearity with other genome sequences with a similarity of 95 % in the NCBI database. MUMmer ( version 3.23 ) was used to quickly compare the genomes of strain FJ21 and five closely related strains (*Photobacterium kishitanii* ATCCBAA-1194, *Photobacterium phosphoreum* JCM21184, *Photobacterium aquimaris* LC2-065, *Photobacterium malacitanum* CECT9190, and *Photobacterium carnosum* TMW 2.2021). Visualize each Contig of the genome using a brown box in the ggplot2 package in R language. Yellow lines between genomes represent Colinear and blue lines between genomes represent Inversion.

#### 2.6. Prediction of secondary metabolite gene cluster

The assembled genome was analyzed by using antiSMASH version 6.0.0, and the parameters were selected from taxon bacteria.

#### 2.7. For detection of heavy metal toxicity

The slant test-tube strains were eluted with 2ml of 3% NaCl solution, and after fully shaking, 200 $\mu$ L was taken into 50 ml of liquid culture medium, and cultured at 25 °C for 20-22h. Take 200 $\mu$ L bacterial solution into 40 ml of 3% NaCl solution and stir for 40 min for detection.

Dilute the solution of heavy metals(ZnSO<sub>4</sub>·7H<sub>2</sub>O, CuSO<sub>4</sub>·5H<sub>2</sub>O, Pb(NO<sub>3</sub>)<sub>2</sub>, CdCl<sub>2</sub>·2.5H<sub>2</sub>O, K<sub>2</sub>Cr<sub>2</sub>O<sub>7</sub>) to be measured with 3%NaCl into a series of concentration gradients. Add 0.1mL of the balanced bacterial solution into each sample tube, then take 1.9mL of the substance to be tested, and take 1.9mL of 3%NaCl as a blank. After 15min exposure, the luminous intensity was measured by portable Lux-T020 toxicity analyzer, and the dose-effect curve was drawn to obtain the half effect concentration (EC<sub>50</sub>).

### 3. Results and Discussion

#### 3.1. The growth morphology, 16S rRNA and lux operator analysis

142  
143  
144  
145

### 3.1.1. Growth morphology of strain

After the strain is cultured for 24 hours, the colony shape is round, slightly raised, smooth, milky white and short rod, which emits bright blue-green light in the dark, as shown in Fig 1.

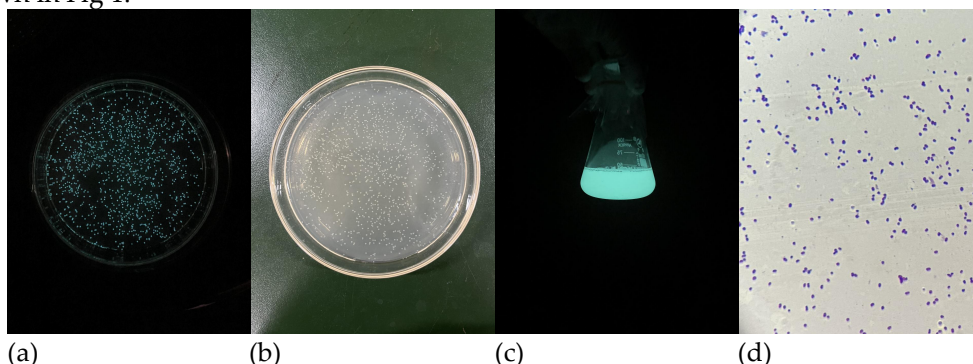

146  
147  
148  
149  
150

**Figure 1.** Growth morphology of the strain. (a) Colony morphology on solid medium; (b) Colony morphology on solid medium under dark conditions; (c) Colony morphology on liquid culture medium under dark conditions; (d) Morphology of strains under oil microscope.

151

### 3.1.2. 16S rRNA analysis

After the 16S rRNA sequence was compared with NCBI database by Blast. The results showed that strain FJ21 belonged to Proteobacteria, Gammaproteobacteria, Vibrionales, Vibrionaceae and *Photobacterium*. Based on the phylogeny of 16S rRNA gene sequence, FJ21 clustered with the strain *Photobacterium phosphoreum* and *Photobacterium kishitanii*. (Fig 2).

152  
153  
154  
155  
156  
157  
158  
159  
160  
161  
162  
163  
164  
165  
166  
167  
168  
169  
170

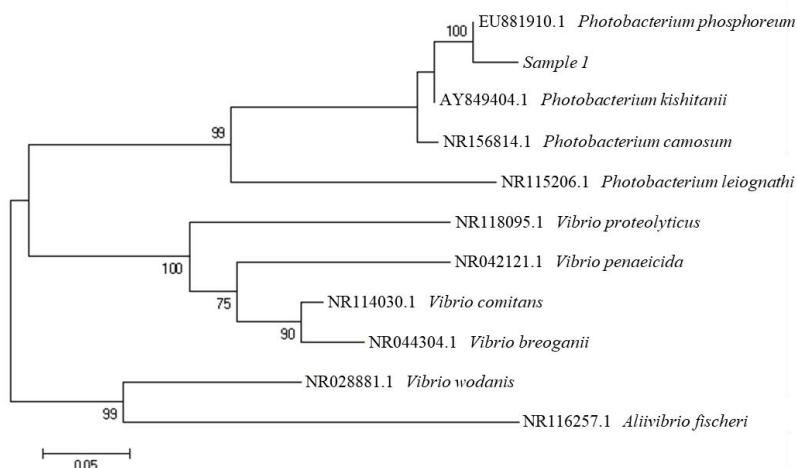

171  
172

**Figure 2.** Neighbour Joining phylogenetic tree based on 16S rRNA gene sequences.

173  
174  
175  
176  
177  
178

### 3.1.3. Physicochemical properties of the protein encoded by *lux* gene

The sequencing results showed that *luxC*(1437bp), *luxD*(921bp), *luxA*(1074bp), *luxB*(987bp), *luxF* (696bp), *luxE* (1122bp), *luxG*(705bp) genes existed in strain FJ21. Online software ExPASy (<https://www.expasy.org/>) was used to predict the physicochemical properties of proteins encoded by *luxC*, *luxD*, *luxA*, *luxB*, *luxF*, *luxE*, and *luxG* genes (Table 1).

179

**Table 1.** Prediction of physical and chemical properties of the protein encoded by *lux* genes.

| <i>luxC</i> | <i>luxD</i> | <i>luxA</i> | <i>luxB</i> | <i>luxF</i> | <i>luxE</i> | <i>luxG</i> |
|-------------|-------------|-------------|-------------|-------------|-------------|-------------|
|-------------|-------------|-------------|-------------|-------------|-------------|-------------|

|                                    |                     |                     |                     |                    |                       |                     |                     |
|------------------------------------|---------------------|---------------------|---------------------|--------------------|-----------------------|---------------------|---------------------|
| Number of base pairs               | 1437                | 921                 | 1074                | 987                | 696                   | 1122                | 705                 |
| Number of amino acids              | 478                 | 306                 | 357                 | 328                | 231                   | 373                 | 234                 |
| Relative molecular mass            | 54165.62            | 34417.89            | 40536.85            | 37494.22           | 26616.19              | 42929.59            | 26147.99            |
| Theoretical isoelectric point      | 5.38                | 4.98                | 5.21                | 5.26               | 5.07                  | 5.09                | 5.43                |
| Residual number of negative charge | 62                  | 42                  | 51                  | 42                 | 32                    | 52                  | 27                  |
| Residual number of positive charge | 47                  | 28                  | 36                  | 27                 | 25                    | 38                  | 23                  |
| Extinction coefficient             | 77155or76780        | 34045or33920        | 47245or46870        | 30620or30370       | 29005or28880          | 47705or47330        | 31775or31400        |
| Instability coefficient            | 37.57               | 38.63               | 34.29               | 30.53              | 41.84                 | 36.90               | 33.71               |
| hydrophobicity                     | stability<br>-0.223 | stability<br>-0.153 | stability<br>-0.381 | stability<br>-0.32 | instability<br>-0.362 | stability<br>-0.389 | stability<br>-0.029 |

180 It can be seen that the positive charge residues carried by the protein encoded by  
 181 the gene are less than the negative charge residues, and the isoelectric point is between  
 182 4.98 and 5.43, indicating that the protein is easy to precipitate between these values.  
 183 Only the protein encoded by the *luxF* gene is unstable, and the protein encoded by other  
 184 genes is stable. In addition, the hydrophobicity is negative, indicating that these proteins  
 185 have certain hydrophilicity.

#### 186 3.1.4. Prediction of secondary and tertiary structures proteins encoded by *lux* genes

187 For unknown proteins, their secondary and tertiary structures can be predicted by  
 188 amino acid sequences. The online analysis software PSIPRED was used to predict the  
 189 secondary structure of the protein encoded by *lux* genes (Figure 3). The amino acid  
 190 sequence of the pink part was  $\alpha$ -helix, and the amino acid sequence of the yellow part  
 191 was  $\beta$ -sheet. SWISS-MODEL database (<http://swissmodel.expasy.org/repository/>) was  
 192 used to predict the tertiary structure of proteins (Figure 4). The protein structure in this  
 193 database was predicted by the homology modeling method. When the sequence  
 194 similarity between the predicted protein and the template protein exceeds 30 %, the  
 195 homology modeling method can generate the tertiary structure of the protein with a  
 196 prediction accuracy of 90%. Except for the *lux G* gene, the similarity of sequences  
 197 encoded by other genes was more than 30 % after alignment, so the tertiary structure of  
 198 the protein was closer to the real structure. From the predicted secondary and tertiary  
 199 structures of *lux* genes encoding proteins, it can be seen that the  $\alpha$  subunit and  $\beta$  subunit  
 200 of the luciferase encoded by *luxA* and *luxB* genes have  $\beta$ -sheet barrel structures, which  
 201 may be these two genes play an important role in the luminescence activity of  
 202 luminescent bacteria. Understanding the tertiary structure of proteins is of great

203

significance for studying functional structures (such as molecular docking).

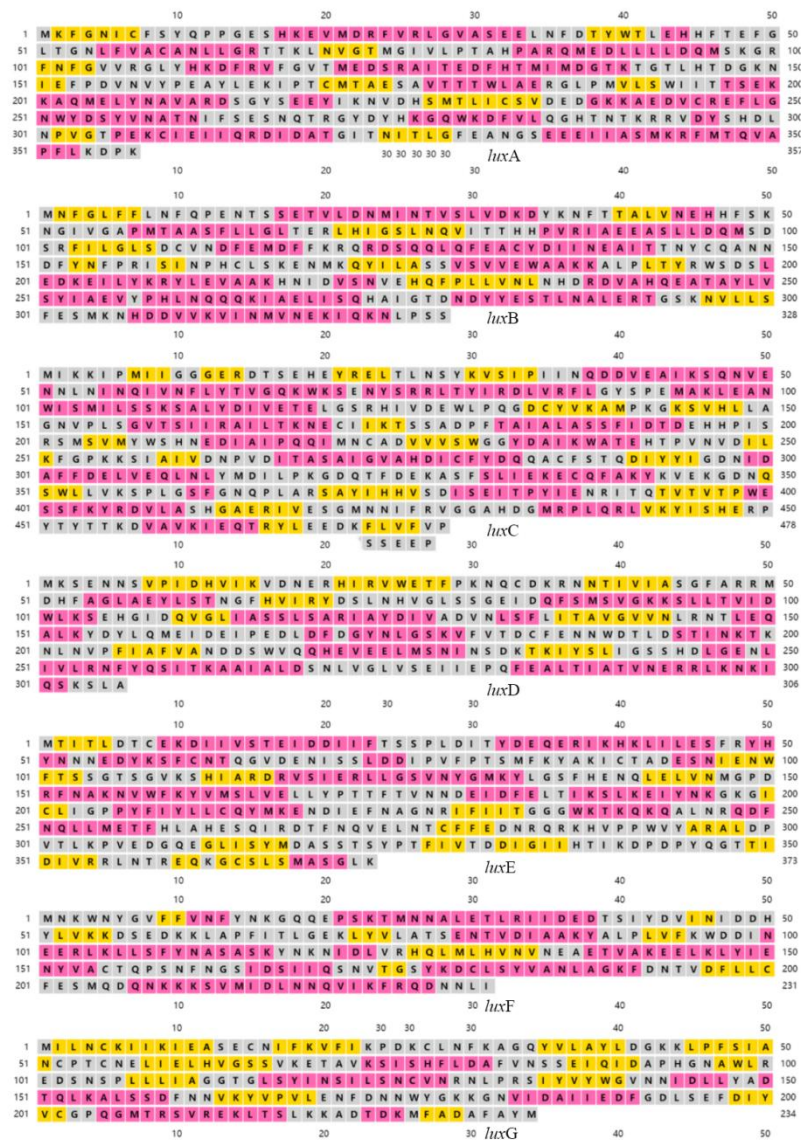

204

205

206

**Figure 3.** Prediction of protein secondary structure encoded by *lux* genes. The amino acid sequence of the pink part was  $\alpha$ -helix, and the amino acid sequence of the yellow part was  $\beta$ -sheet.

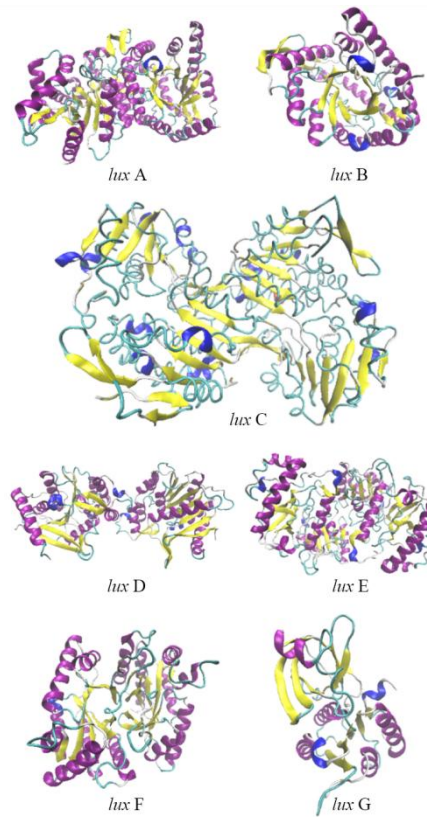

**Figure 4.** Prediction of protein tertiary structure encoded by *lux* genes, including *luxA*, *luxB*, *luxC*, *luxD*, *luxE*, *luxF*, *luxG*,  $\alpha$ -helix (purple),  $\beta$ -sheet (yellow), turn (blue) and random coil (green).

### 3.2. Genome Sequencing and Assembly

The sequencing data are shown in Supplementary Table S1 and the assembly results are shown in Table 2. The genome size was 4853277 bp, the number of coding genes was 4131, and the N50 was 3252201 bp. ATGC content accounted for 30.49 %, 30.29 %, 19.72 %, and 19.50 % of the total base, respectively, and the GC content was 39.23 % (Supplementary Table S2). The genome circle is shown in Figure 5. The genome sequence of strain FJ21 has been submitted to the GenBank database with accession number SRX10356131.

**Table 2.** Assembly result statistics.

| Feature         | Data    |
|-----------------|---------|
| Total bases     | 4853277 |
| Contig number   | 2       |
| Contig N50      | 3252201 |
| Longest Contig  | 3252201 |
| Shortest Contig | 1601076 |

207  
208  
209  
210  
211  
212  
213  
214  
215  
216  
217  
218  
219

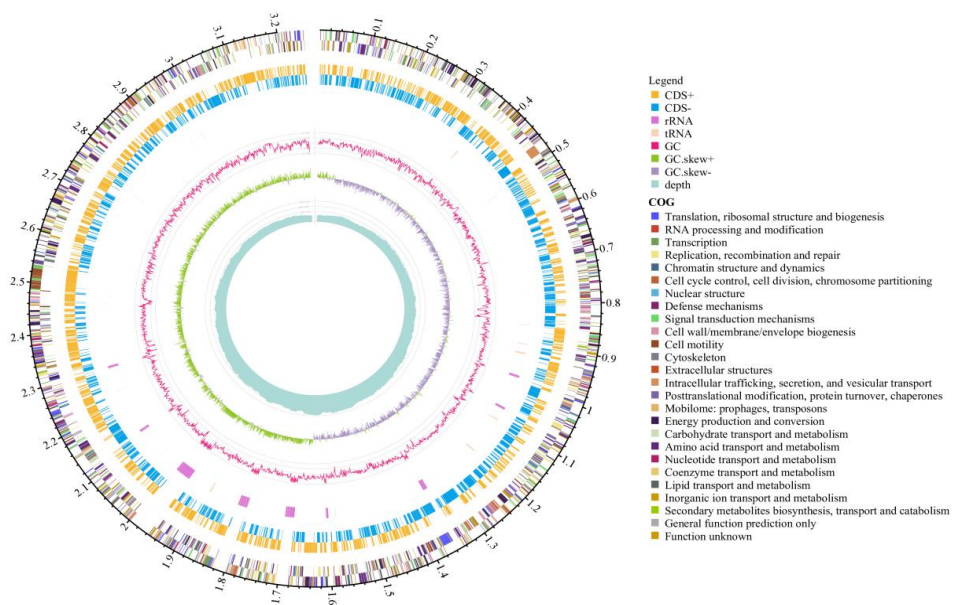

**Figure 5.** Genome circle diagram of strain FJ21. The characteristics of the marker are shown from outside to inside as follows: colored on clusters of orthologous groups (COG) functional categories, on the forward strand, coding sequences (CDSs); tRNA and rRNA; GC content (outward plots as positive values and inward plots as negative values); GC skew ( $G - /G + C$ , the leading chain and the lagging chain can be judged by the change of GC skew, generally the leading chain GC skew  $> 0$ , the lagging chain GC skew  $< 0$ ) and Sequencing depth.

### 3.3. Genome Structure and function Annotation

The genome contains 4131 CDSs, 4027962 bp in length, and a CRISPR sequence (a cluster of regularly spaced short palindromic repeats, often found in many bacteria and archaea). Gene islands are not predicted on the genome. The results of genome structure prediction are shown in Supplementary Table S3.

There are 1,769, 3,141, 2472, 4070, 3514, and 1413 genes that were annotated respectively relate the d to KEGG pathway, COG category, GO, Refseq, Pfam and TIGRFAMs databases, and annotated results are shown in Supplementary Table S4.

#### 3.3.1. COG function classification

In the COG category (Figure 6), there are 232 Energy production and conversion, 328 Amino acid transport, and metabolism, 210 Carbohydrate Transport and metabolism, 265 Translation, ribosomal structure and biogenesis, 266 Transcription, 267 Cell wall/membrane/envelope biogenesis and 194 Inorganic ion transport and metabolism. The corresponding protein sequence was compared with the COG database to complete the annotation classification of homologous genes, and the coding genes including information storage and processing, cell biology process and signal transduction, basic metabolism, and unknown functions were obtained [35]. As shown in Figure 3, a total of 3141 proteins obtained COG functional annotations, accounting for 76.03 % of the total number of predicted genes, including Energy production and conversion, Amino acid transport and metabolism, Carbohydrate Transport and metabolism, Translation/ribosomal structure and biogenesis, Transcription, Cell wall/membrane/envelope biogenesis, Inorganic ion transport and metabolism, and the number of genes was 232, 328, 210, 265, 266, 267 and 194, respectively.



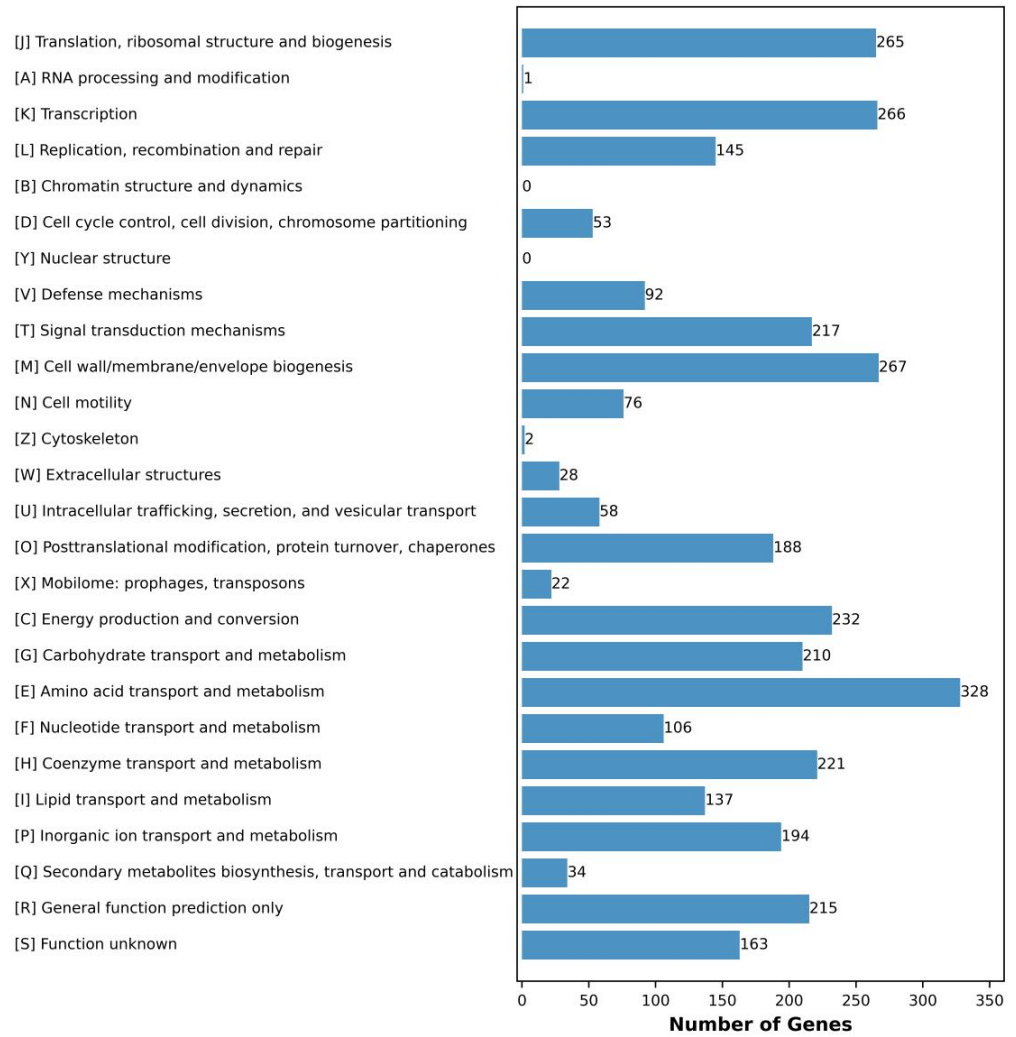

**Figure 6.** COG functional classification of strain FJ21, including Translation, ribosomal structure and biogenesis, RNA processing and modification, Transcription, Replication, recombination and repair, Cell cycle control, cell division, chromosome partitioning, Defense mechanisms, Signal transduction mechanisms, Cell wall/membrane/envelope biogenesis, Cell motility, Cytoskeleton, Extracellular structures, Intracellular trafficking, secretion, and vesicular transport, Posttranslational modification, protein turnover, chaperones, Mobilome: prophages, transposons, Energy production and conversion, Carbohydrate Transport and metabolism, Amino acid transport and metabolism, Nucleotide transport and metabolism, Coenzyme transport and metabolism, Lipid transport and metabolism, Inorganic ion transport and metabolism, Secondary metabolites biosynthesis, transport and catabolism.

### 3.3.2. GO function classification

As shown in Figure 7, a total of 2472 genes were annotated for GO function, accounting for 59.84 % of the total number of predicted genes. GO function mainly divides them into molecular function, biological process and cellular component[36]. In molecular function, there are many genes annotated by molecular transducer activity, antioxidant activity and transporter activity. In the biological process, there are many genes annotated by metabolic process, positive regulation of the biological process, and negative regulation of the biological process. In cell components, there are many genes annotated by cell, cell part and membrane part. Therefore, GO functional annotation is more convenient for us to understand the biological significance behind genes.

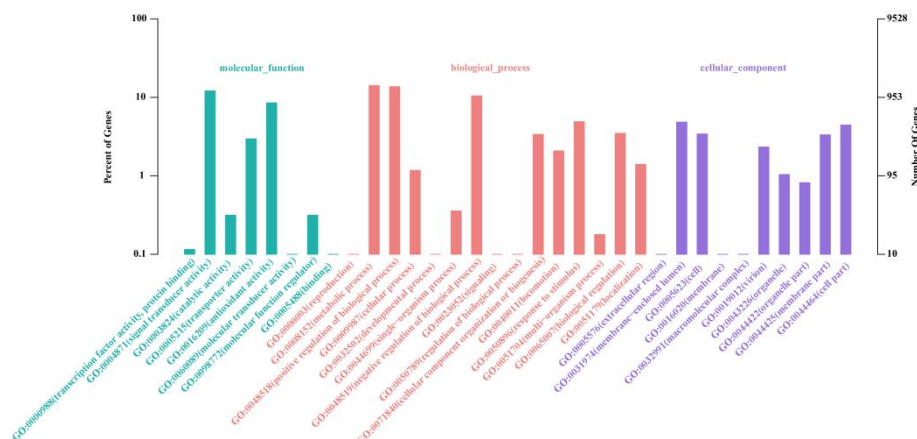

**Figure 7.** Go function classification diagram. There are three main sections: molecular function(including transcription factor activity, protein binding, signal transducer activity, catalytic activity, transporter activity, antioxidant activity, molecular transducer activity, molecular function regulator, binding ), biological process(including reproduction, metabolic process, positive regulation of biological process, cellular process, developmental process, single-organism process, negative regulation of the biological process, signaling, regulation of biological process, cellular component organization or biogenesis, locomotion, response to stimulus, multi-organism process, biological regulation, localization ) and cellular component(including extracellular region, membrane-enclosed lumen, cell, membrane, macromolecular complex, virion, organelle, organelle part, membrane part, cell part)

### 3.3.3. KEGG pathway analysis

The 2945 genes in the KEGG pathway were enriched in 208 metabolic pathways (figure 8), and the number of effectively annotated genes was 1769, accounting for 42.82 % of the total predicted genes. There are five categories, namely Metabolism, Genetic Information Processing, Environmental Information Processing, Cellular processes and Organismal Systems. The most annotated genes in metabolism are carbohydrate metabolism, energy metabolism, and amino acid metabolism. The main pathways are oxidative phosphorylation pathway (ko00190) (40 genes), arginine and proline pathway (ko00330) (16 genes), glycolysis/ gluconeogenesis pathway (ko00010) (31 genes), citric acid cycle (TCA cycle) (ko00020) (19 genes). The least genes were annotated in organismal systems.

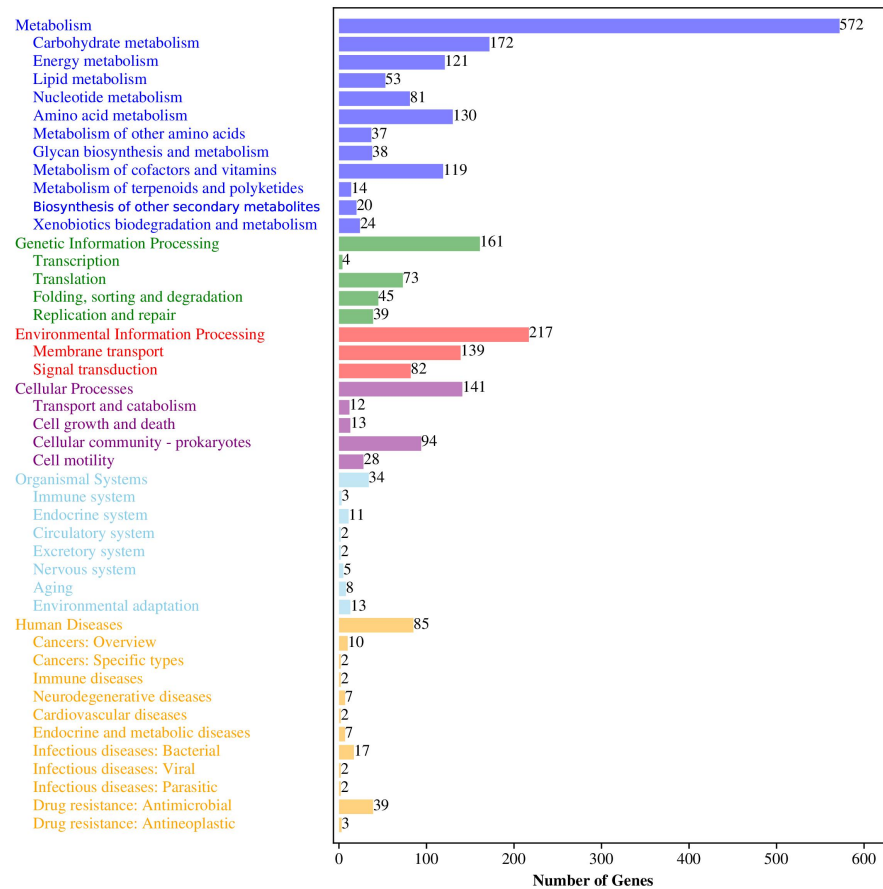

**Figure 8.** KEGG function classification diagram, including metabolism, genetic information processing, environmental information processing, cellular processes, organismal systems, human diseases; the number of genes (right).

### 3.3.4. Analysis of interaction genes between pathogen and host

Most luminous bacteria are nonpathogenic[38], while two subspecies of *Vibrio harveyi* and *Photobacterium damsela* are pathogens of many aquatic organisms[37,38]. 870 genes were annotated in the PHI database (Figure 9), of which 326 genes (55.72 %) resulted in reduced virulence. There were 43 increased virulence genes, 217 unaffected pathogenicity genes, 82 loss of pathogenicity genes, 103 effector genes, resistance to chemical and sensitivity to chemical genes were the least. In this annotation, most of the genes belonged to the reduced virulence genes and unaffected pathogenicity genes. Effector genes are associated with pathogenicity, but increased virulence genes are the key genes.

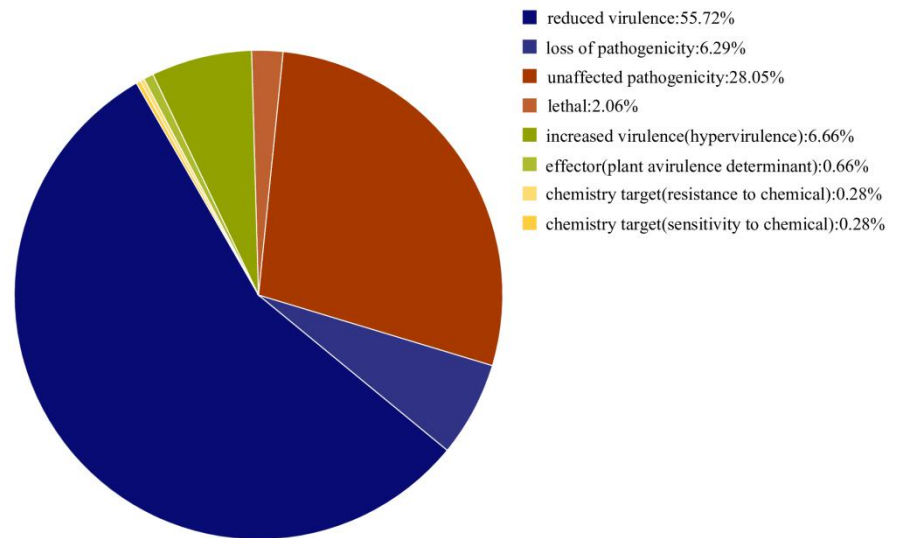

**Figure 9.** Gene analysis of pathogen host interaction. From left (blue) to right (yellow) as follows: reduced virulence genes; loss of pathogenicity genes; unaffected pathogenicity genes; lethal genes; increased virulence genes; effector genes; chemistry target (resistance to chemical) and chemistry target (sensitivity to chemical) genes.

### 3.3.5. Annotation of Resistance Genes in the CARD Database

The antibiotic resistance genes were annotated using the CARD database, and the information was shown in Table 3. Including the classification of ARO, the Identities, the classification of antibiotics, the resistance mechanism, and the classification of the AMR gene family. The highest identities can reach 100 %. The resistance mechanisms are antibiotic efflux and antibiotic target Alteration (Supplementary Table S5).

**Table 3.** Antibiotic resistance gene annotation of strain FJ21.

| ARO                                                                          | %Identities | Drug Class                                                                      | Resistance Mechanism         | AMR Gene Family                                                                          |
|------------------------------------------------------------------------------|-------------|---------------------------------------------------------------------------------|------------------------------|------------------------------------------------------------------------------------------|
| rsmA                                                                         | 89.29       | A fluoroquinolone antibiotic, diaminopyrimidine antibiotic, phenicol antibiotic | antibiotic efflux            | resistance-nodulation-cell division (RND)                                                |
| vanWB                                                                        | 100         | glycopeptide antibiotic                                                         | antibiotic target Alteration | antibiotic efflux pump vanW, glycopeptide                                                |
| CRP                                                                          | 94.29       | macrolide antibiotic, fluoroquinolone antibiotic; penam                         | antibiotic efflux            | resistance gene cluster resistance-nodulation-cell division (RND) antibiotic efflux pump |
| Haemophilus influenzae PBP3 conferring resistance to beta-lactam antibiotics | 46.85       | cephalosporin; cephamycin; penam                                                | antibiotic target alteration | Penicillin-binding protein mutations conferring resistance to beta-lactam antibiotics    |

### 3.3.6. Analysis of carbohydrate-related enzymes (CAZy)

322 Carbohydrates are the main source of energy needed to maintain life activities and  
323 are the most widely distributed organic compounds in nature. The carbohydrate-related  
324 enzymes (CAZy) database collected six categories of enzymes, namely glycoside  
325 hydrolases (GHs), glycosyltransferases (GTs), carbohydrate esterases (CEs),  
326 carbohydrate-binding modules (CBMs), auxiliary module enzymes ( AAs ) and  
327 polysaccharide lyases (PLs)[39].

328 In this database, strain FJ21 contains 51 carbohydrate-related enzymes. Among  
329 them, glycoside hydrolases (GHs) gene annotation is the most. There are 19 types of 43  
330 genes, accounting for 34.4%. Glycosides produced by enzymatic hydrolysis of glycosidic  
331 bonds can be used in biological metabolic pathways. Glycosyltransferases (GTs) have 12  
332 types and 32 genes, accounting for 25.6 %. GTs can participate in a variety of life  
333 activities in cells, transferring monosaccharides of active substances in vivo to proteins,  
334 lipids, sugars, and nucleic acids to form glycosylation. Carbohydrate esterases (CEs) and  
335 carbohydrate-binding modules (CBMs) accounted for 16 %, respectively. The auxiliary  
336 modular enzymes (AAs) and polysaccharide lyases (PLs) genes were the least.

### 337 3.4. Phylogenetic tree, ANI and Tetra analysis

#### 338 3.4.1. Genome phylogenetic tree analysis

339 Then the whole genome sequence(Supplementary Table S6) was constructed a  
340 phylogenetic tree (Figure 10). The results showed that *Photobacterium kishitanii*  
341 ATCCBAA-1194, *Photobacterium phosphoreum* JCM21184, *Photobacterium aquimaris* LC2-  
342 065, *Photobacterium malacitanum* CECT9190, and *Photobacterium carnosum* TMW 2.2021  
343 were clustered together in the phylogenetic tree. We found that the whole genome  
344 sequence of strain FJ21 showed a great deal of similarity with the genome of  
345 *Photobacterium kishitanii* ATCCBAA-1194.

346 The difference between the two results may be due to the effect of gene transfer.

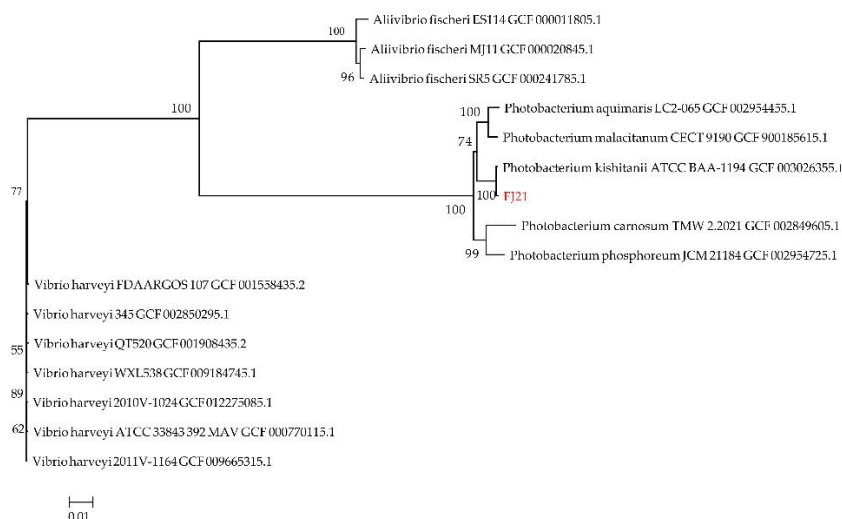

347  
348 **Figure 10.** Phylogenetic tree based on whole-genome genes sequences.

#### 349 3.4.2. ANI and TETRA analysis

350 Average nucleotide identity (ANI) and tetra nucleotide signatures (TETRA)  
351 between strain FJ21 and different *Photobacterium* strains were calculated (Table 4). The  
352 ANI value of strain FJ21 against *Photobacterium kishitanii* were 97.61% (ANIb, based on  
353 BLAST) and 97.55% (ANIm, based on MUMmer), respectively. Both were higher than  
354 the defined threshold (95%). In contrast, against the others, the ANI value was down to  
355 84.68-87.32%, indicating strain FJ21 was phylogenetically close to *Photobacterium*

*kishitanii*. Therefore, strain FJ21 should be reclassified as *Photobacterium kishitanii* rather than *Vibrio fischeri* or *Photobacterium phosphoreum*. The results of Tetra also supported the conclusion.

**Table 4** ANI and tetra nucleotide signatures (TETRA) analyses between strain FJ21 and *Photobacterium* strains.

The asterisk represented the result of self-comparison.

| Species name         | FJ21  |       |       | <i>P.kishitanii</i> |       |       | <i>P.phosphoreum</i> |       |       | <i>P.aquimaris</i> |       |       | <i>P.malacitanum</i> |       |       | <i>P.carnosum</i> |       |       |
|----------------------|-------|-------|-------|---------------------|-------|-------|----------------------|-------|-------|--------------------|-------|-------|----------------------|-------|-------|-------------------|-------|-------|
|                      | AN Ib | AN Im | Tetra | AN Ib               | AN Im | Tetra | AN Ib                | AN Im | Tetra | AN Ib              | AN Im | Tetra | AN Ib                | AN Im | Tetra | AN Ib             | AN Im | Tetra |
| FJ21                 | *     | *     | *     | 97.55               | 97.81 | 0.998 | 85.68                | 87.32 | 0.985 | 85.03              | 87.17 | 0.993 | 84.72                | 86.90 | 0.992 | 84.62             | 86.68 | 0.988 |
| <i>P.kishitanii</i>  | 97.61 | 97.80 | 0.998 | *                   | *     | *     | 85.41                | 87.32 | 0.988 | 84.82              | 87.13 | 0.994 | 84.41                | 86.93 | 0.993 | 84.23             | 86.72 | 0.990 |
| <i>P.phosphoreum</i> | 85.64 | 87.32 | 0.985 | 85.64               | 87.32 | 0.988 | *                    | *     | *     | 84.89              | 86.86 | 0.991 | 84.48                | 86.57 | 0.990 | 85.66             | 87.69 | 0.992 |
| <i>P.aquimaris</i>   | 85.11 | 87.17 | 0.993 | 85.16               | 87.13 | 0.994 | 85.03                | 86.86 | 0.991 | *                  | *     | *     | 92.61                | 92.97 | 0.998 | 84.10             | 86.87 | 0.989 |
| <i>P.malacitanum</i> | 84.68 | 86.09 | 0.992 | 84.62               | 86.86 | 0.993 | 84.56                | 86.57 | 0.990 | 92.44              | 92.96 | 0.998 | *                    | *     | *     | 83.23             | 86.09 | 0.986 |
| <i>P.carnosum</i>    | 84.68 | 86.69 | 0.988 | 84.65               | 86.72 | 0.990 | 86.07                | 87.69 | 0.992 | 84.26              | 86.88 | 0.989 | 83.42                | 86.10 | 0.986 | *                 | *     | *     |

### 3.5. Genome collinearity analysis

#### 3.5.1. The basic characteristics of genomes

The genome size of the six strains is similar, ranging from 4380538bp to 4853277bp, and the number of coding genes is 3739-4131 (Table 5). The genome characteristics of different strains of the same bacteria are closer, the strain FJ21 is closer to *Photobacterium kishitanii* in genome size. Compared with the number of coding genes and RNA of other strains, the results showed that the number of coding genes and RNA predicted were significantly higher than others.

**Table 5.** Genome features of *P.kishitanii*, *P.phosphoreum*, *P.aquimaris*, *P.malacitanum*, *P.carnosum* and strain FJ21.

| Species name         | Genome size (bp) | Coding gene | tRNAs | 5S、16S、23S rRNA |
|----------------------|------------------|-------------|-------|-----------------|
| <i>P.kishitanii</i>  | 4732354          | 4087        | 159   | 6, 6, 5         |
| <i>P.phosphoreum</i> | 4550107          | 3840        | 73    | 3, 0, 1         |
| <i>P.aquimaris</i>   | 4525475          | 3826        | 83    | 1, 0, 1         |
| <i>P.malacitanum</i> | 4380538          | 3739        | 186   | 10, 15, 12      |
| <i>P.carnosum</i>    | 4559543          | 3984        | 122   | 8, 1, 8         |
| FJ21                 | 4853277          | 4131        | 226   | 24, 22, 22      |

#### 3.5.2. Collinearity analysis

MUMmer (version 3.23) software was used to compare the strain FJ21 with *Photobacterium kishitanii* ATCCBAA-1194, *Photobacterium phosphoreum* JCM21184, *Photobacterium aquimaris* LC2-065, *Photobacterium malacitanum* CECT9190, and *Photobacterium carnosum* TMW 2.2021. The collinearity and structural variation of genomic sequences are shown in Figure 11, and there were 218, 744, 717, 748, and 708 contrast blocks between *Photobacterium kishitanii* ATCCBAA-1194, *Photobacterium phosphoreum* JCM21184, *Photobacterium aquimaris* LC2-065, *Photobacterium malacitanum*

379  
380  
381  
382  
383

CECT9190, and *Photobacterium carnosum* TMW 2.2021 and the strain FJ21, respectively. They accounted for 86.92 %, 70.27 %, 64.82 %, 65.16 % and 56.32 % of the genome of the strain, respectively. According to the results, the collinearity between genomes is good, but there are a small number of genome rearrangement events such as inversion and translocation. It can be seen that the six strains still have great differences in evolution.

384  
385

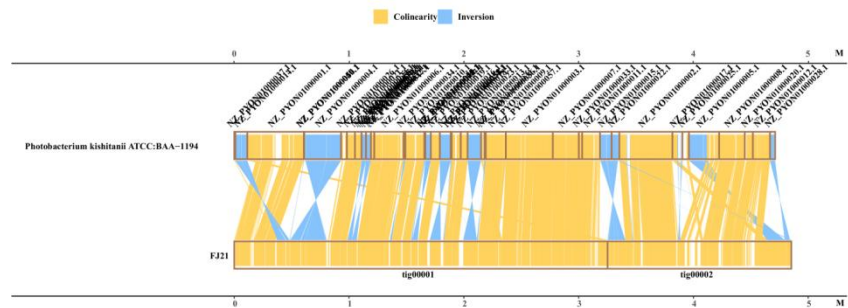

A

386  
387

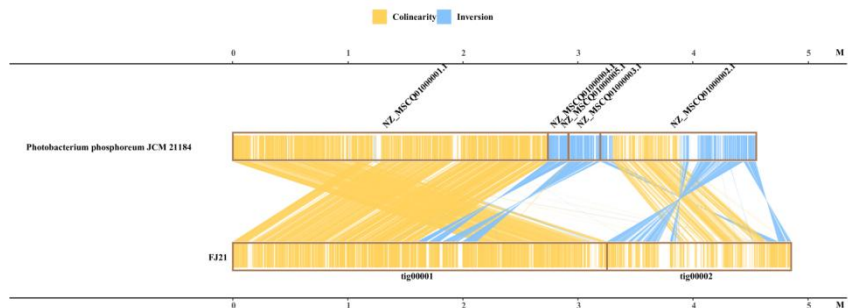

B

388  
389

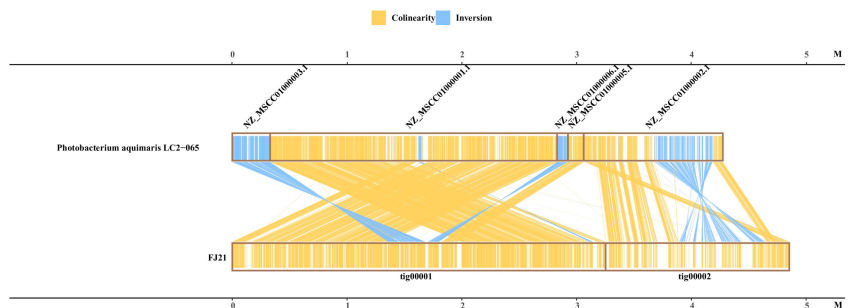

C

390  
391

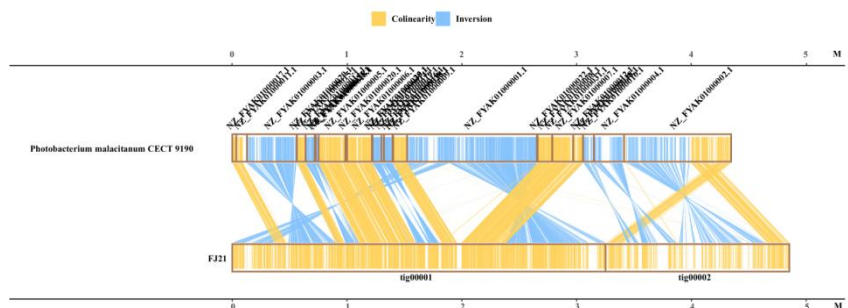

D

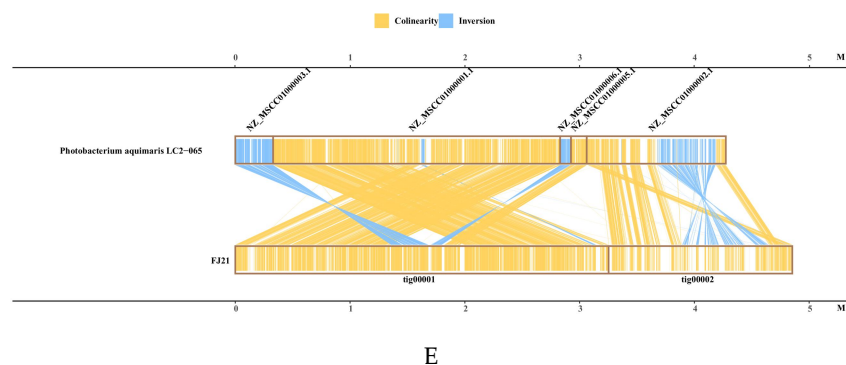

**Figure 11.** Collinearity analysis of strain FJ21, *P. kishitanii*, *P. phosphoreum*, *P. aquimaris*, *P. malacitanum* and *P. carnosum*. (A) Collinearity analysis of *P. kishitanii* and strain FJ21, (B) Collinearity analysis of *P. phosphoreum* and strain FJ21, (C) Collinearity analysis of *P. aquimaris* and strain FJ21, (D) Collinearity analysis of *P. malacitanum* and strain FJ21, (E) Collinearity analysis of *P. carnosum* and strain FJ21.

### 3.6. Secondary metabolite gene clusters

The encoding genes of secondary metabolites are usually clustered in the genome, encoding complex enzymes with multiple functions. AntiSMASH ( version 6.0.0 ) software was used to predict the gene cluster of the assembled genome. Three types of secondary metabolite gene clusters(RiPP-like, beta lactone, and arylpolyene) were predicted in the FJ21 genome(Table 6), and siderophore only exists in *Photobacterium phosphoreum*.

**Table 6.** Gene clusters of a secondary metabolite of *Photobacterium kishitanii* ATCCBAA-1194, *Photobacterium phosphoreum* JCM21184, *Photobacterium aquimaris* LC2-065, *Photobacterium malacitanum* CECT9190, and *Photobacterium carnosum* TMW 2.2021 and strain FJ21.

| Species name          | Cluster type | Start gene and End gene |
|-----------------------|--------------|-------------------------|
| FJ21                  | RiPP-like    | 01645-01653             |
|                       | Betalactone  | 01929-01947             |
|                       | Arylpolyene  | 03136-03175             |
| <i>P. kishitanii</i>  | Betalactone  | 58033-83578             |
|                       | Arylpolyene  | 6204-49845              |
|                       | RiPP-like    | 53445-64308             |
| <i>P. phosphoreum</i> | siderophore  | 607412-619838           |
|                       | Arylpolyene  | 1098069-1141719         |
|                       | Betalactone  | 66857-92412             |
|                       | RiPP-like    | 52861-63724             |
| <i>P. aquimaris</i>   | Betalactone  | 33216-58753             |
|                       | Arylpolyene  | 203830-247492           |
|                       | RiPP-like    | 52780-63643             |
| <i>P. malacitanum</i> | Arylpolyene  | 884620-928282           |
|                       | RiPP-like    | 53563-64426             |
|                       | Betalactone  | 33744-59282             |
| <i>P. carnosum</i>    | Betalactone  | 32103-56200             |
|                       | RiPP-like    | 25713-36576             |

### 3.7. For detection of heavy metal toxicity

The fitted concentration-response curve of the single toxicity of heavy metal to the strain FJ21 is shown in the figure 12, and the parameter values of concentration-dose effect curve are shown in the table 7. With the increase of heavy metal concentration, the inhibition rate of bacteria's luminescence gradually increased.  $R^2$  values are all greater



414  
415  
416  
417  
418  
419  
420

than 0.98, which indicates that the concentration of heavy metals is positively related to its inhibition rate of luminescent bacteria. The  $EC_{50}$  value can reflect the toxicity of pollutants. The smaller the  $EC_{50}$  value, the greater the toxicity. According to the table, the  $EC_{50}$  values of  $Pb(NO_3)_2$ ,  $ZnSO_4 \cdot 7H_2O$ ,  $CdCl_2 \cdot 2.5H_2O$ ,  $CuSO_4 \cdot 5H_2O$  and  $K_2Cr_2O_7$  to luminescent bacteria are 1.11mg/L, 1.57mg/L, 28.63mg/L, 77.35mg/L and 201.80mg/L, respectively. The toxicity is  $Pb(NO_3)_2 > ZnSO_4 \cdot 7H_2O > CdCl_2 \cdot 2.5H_2O > CuSO_4 \cdot 5H_2O > K_2Cr_2O_7$ .

421

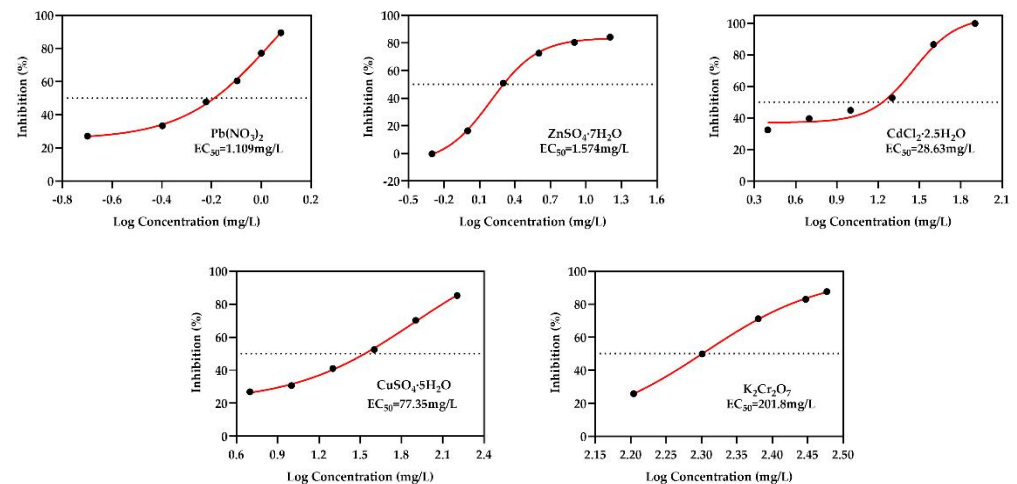

422  
423  
424  
425  
426

**Figure 12.** The fitted concentration-response curve of the single toxicity of heavy metal to the strain FJ21. The abscissa represents the logarithm of heavy metal concentration, and the ordinate represents the luminescence inhibition rate of the strain FJ21.

**Table 7.** parameter values of concentration-dose effect curve.

| Heavy metal          | $EC_{50}$ (mg/L) | Ion mass concentration | $R^2$  |
|----------------------|------------------|------------------------|--------|
| $ZnSO_4 \cdot 7H_2O$ | 1.57             | 0.36                   | 0.9994 |
| $CuSO_4 \cdot 5H_2O$ | 77.35            | 19.80                  | 0.9988 |
| $Pb(NO_3)_2$         | 1.11             | 14.09                  | 0.9962 |
| $CdCl_2 \cdot 2H_2O$ | 28.63            | 0.69                   | 0.9848 |
| $K_2Cr_2O_7$         | 201.80           | 35.67                  | 0.9992 |

427  
428  
429  
430  
431  
432  
433  
434  
435  
436  
437  
438  
439  
440  
441  
442  
443

#### 4. Conclusions

The colony shape is round, slightly raised, smooth, milky white and short rod, which emits bright blue-green light in the dark. Based on 16S rRNA the strain FJ21 was phylogenetically close to the strain *Photobacterium phosphoreum* and *Photobacterium kishitanii*. While the whole genome, ANI, TETRA analyses and collinearity analysis further verified the relationship between strain FJ21 and the species of *Photobacterium kishitanii* ATCCBAA-1194. Therefore, we argue that strain FJ21 should be classified as a strain of *Photobacterium kishitanii*. This indicates that the whole genome analytic method is very important for species identification.

The strain contains a chromosome with a total length of 4853277bp and GC content of 39.23%. According to the predicted secondary and tertiary structure of the *lux* gene and its encoded protein, the strain contained *luxC*, *luxD*, *luxA*, *luxB*, *luxF*, *luxE*, and *luxG* genes. However, the function of *luxF* gene is still uncertain. Understanding the *lux* genes will help to understand luminescent activities and the mechanism.

In the toxicity test, the toxicity of heavy metals to strain FJ21 is as follows:  $Pb(NO_3)_2 > ZnSO_4 \cdot 7H_2O > CdCl_2 \cdot 2.5H_2O > CuSO_4 \cdot 5H_2O > K_2Cr_2O_7$ .

**Supplementary Materials:** Table S1: Sequencing data statistics. Table S2: Assembly results statistics. Table S3: Genome structure prediction statistics. Table S4: Functional annotation statistics of genome-encoded proteins. S5: Annotation of Resistance Genes in the CARD database. Table S6: The list of genomes used in the study. Word: the strain FJ21 genomic.

**Funding:** This research was funded by the National Natural Science Foundation of China (31672457) and the Project of Hunan Provincial Department of science and technology (2019TP2004, 2020NK2004, 2021JJ30008)

**Data Availability Statement:** The available complete genome sequence has been admitted to GenBank databases with accession number SRX10356131.

**Acknowledgments:** Authors would like to thank the Hunan Provincial Engineering Research Center of Applied Microbial Resources Development for Livestock and Poultry for technical supporting.

**Conflicts of Interest:** The authors declare that they have no competing interests in this paper.

## References

1. Brodl, E.; Winkler, A.; Macheroux, P. Molecular Mechanisms of Bacterial Bioluminescence. *Comput. Struct. Biotechnol. J.* **2018**, *16*, 551-564. [PubMed]
2. Gong, L.; Wu, Y.; Jian, Q.J.; Yin, C.X.; Li, T.T.; Gupta, V.K.; et al. Complete genome sequencing of the luminescent bacterium, *Vibrio qinghaiensis* sp. Q67 using PacBio technology. *Scientific. Data.* **2018**, 170205
3. Zavilgelsky, G.B.; Shakulov, R.S. Mechanisms and Origin of Bacterial Bioluminescence. *Mol Biol.* **2018**, *52*, 935-947. [PubMed]
4. Brodl, E.; Niederhauser, J.; Macheroux, P. In Situ Measurement and Correlation of Cell Density and Light Emission of Bioluminescent Bacteria. *J. Vis. Exp.* **2018**, 57881. [PubMed]
5. Alloush, H.M.; Lewis, R.J.; Salisbury, V.C. Bacterial Bioluminescent Biosensors: Applications in Food and Environmental Monitoring. *Analytical. Letters.* **2006**, *39*, 1517-1526. [PubMed]
6. Oku, N.; Kawabata, K.; Adachi, K.; Katsuta, A.; Shizuri, Y. Unnarmicins A and C, new antibacterial depsipeptides produced by marine bacterium *Photobacterium* sp. MBIC06485. *J Antibiot.* **2008**, *61*, 11-17. [PubMed]
7. Ryu, H.S.; Kim, H.K.; Choi, W.C.; Kim, M.H.; Park, S.Y.; Han, N.S.; Oh, T.K.; Lee, J.K. New cold-adapted lipase from *Photobacterium lipolyticum* sp. nov. that is closely related to filamentous fungal lipases. *Appl. Microbiol. Biotechnol.* **2006**, *70*, 321-326. [PubMed]
8. Yaacob, M.A.; Hasan, W.A.; Ali, M.S.; Rahman, R.N.; Salleh, A.B.; Basri, M.; Leow, T.C. Characterisation and molecular dynamic simulations of J15 asparaginase from *Photobacterium* sp. strain J15. *Acta. Biochim. Pol.* **2014**, *61*, 745-752. [PubMed]
9. Shakiba, M. H.; Ali, M. S.; Rahman, R. N.; Salleh, A. B.; & Leow, T. C. Cloning, expression and characterization of a novel cold-adapted GDSL family esterase from *Photobacterium* sp. strain J15. *Extremophiles.* **2016**, *20*, 44-55. [PubMed]
10. Girotti, S.; Ferri, E.N.; Fumo, M.G.; Maiolini, E. Monitoring of environmental pollutants by bioluminescent bacteria. *Anal. Chim. Acta.* **2008**, *608*, 2-29. [PubMed]
11. Adnan, N.A.; Halmi, M.I.E.; Abd Gani, S.S.; Zaidan, U.H.; Abd Shukor, M.Y. Comparison of Joint Effect of Acute and Chronic Toxicity for Combined Assessment of Heavy Metals on *Photobacterium* sp. NAA-MIE. *Int J Environ Res Public Health.* **2021**, *18*, 6644. [PubMed]
12. Zhu, W.J.; Xu, Y.T.; Zhang, Q.Z.; Yang, J.; Ding, G.R.; Wang, X.Y. Application and development of monitoring with luminous bacteria for environmental pollutants. *Water. Purification. Technolo.* **2010**, *29*, 54-59.
13. Li, Z.X.; Yin, Q.; Zhao, J.N.; Li, G.X.; Liu, Y.F.; Li, W. Advance in the application of luminescent bacteria on detecting acute toxicity of water. *Hebei University of Science and Technology.* **2014**, *35*, 480-486.
14. Senol Cali, D.; Kim, J.S.; Ghose, S.; Alkan, C.; Mutlu, O. Nanopore sequencing technology and tools for genome assembly: computational analysis of the current state, bottlenecks and future directions. *Brief. Bioinform.* **2019**, *20*, 1542-1559. [PubMed]
15. Walker, B. J.; Abeel, T.; Shea, T.; Priest, M.; Abouelliel, A.; Sakthikumar, S.; Cuomo, C.A.; Zeng, Q.; Wortman, J.; Young, S.K.; Earl, A. M. Pilon: an integrated tool for comprehensive microbial variant detection and genome assembly improvement. *PLoS one.* **2014**, *9*, e112963. [PubMed]
16. Hu, J.; Fan, J.; Sun, Z.; Liu, S. NextPolish: a fast and efficient genome polishing tool for long-read assembly. *Bioinformatics.* **2020**, *36*, 2253-2255. [PubMed]
17. Hunt, M.; Silva, N.D.; Otto, T. D.; Parkhill, J.; Keane, J.A.; Harris, S.R. Circlator: automated circularization of genome assemblies using long sequencing reads. *Genome. biology.* **2015**, *16*, 294. [PubMed]
18. Hyatt, D.; Chen, G.L.; Locascio, P.F.; Land, M.L.; Larimer, F.W.; Hauser, L.J. Prodigal: prokaryotic gene recognition and translation initiation site identification. *BMC. Bioinformatics.* **2010**, *11*, 119. [PubMed]

- 496 19. Lagesen, K.; Hallin, P.; Rødland, E.A.; Staerfeldt, H. H.; Rognes, T.; Ussery, D.W. RNAmmer: consistent and rapid annotation  
497 of ribosomal RNA genes. *Nucleic. Acids. Res.* **2007**, *35*, 3100–3108. [PubMed]
- 498 20. Lowe, T.M.; Eddy, S.R. tRNAscan-SE: a program for improved detection of transfer RNA genes in genomic sequence. *Nucleic*  
499 *Acids Res.* **1997**, *25*, 955–964. [PubMed]
- 500 21. Nawrocki, E.P.; Eddy, S.R. Infernal 1.1: 100-fold faster RNA homology searches. *Bioinformatics.* **2013**, *29*, 2933–2935. [PubMed]
- 501 22. Kalvari, I.; Argasinska, J.; Quinones-Olvera, N.; Nawrocki, E.P.; Rivas, E.; Eddy, S.R.; Bateman, A.; Finn, R.D.; Petrov, A. I.  
502 Rfam 13.0: shifting to a genome-centric resource for non-coding RNA families. *Nucleic. Acids. Research.* **2018**, *46*, D335–D342.  
503 [PubMed]
- 504 23. Hudson, C.M.; Lau, B.Y.; Williams, K.P. Islander: a database of precisely mapped genomic islands in tRNA and tmRNA  
505 genes. *Nucleic. Acids. Res.* **2015**, *43*, D48–D53. [PubMed]
- 506 24. Jones, P.; Binns, D.; Chang, H.Y.; Fraser, M.; Li, W.; McAnulla, C.; McWilliam, H.; Maslen, J.; Mitchell, A.; Nuka, G.; Pesseat, S.;  
507 Quinn, A.F.; Sangrador-Vegas, A.; Scheremetjew, M.; Yong, S.Y.; Lopez, R.; Hunter, S. InterProScan 5: genome-scale protein  
508 function classification. *Bioinformatics.* **2014**, *30*, 1236–1240. [PubMed]
- 509 25. Haft, D.H.; Selengut, J.D.; Richter, R.A.; Harkins, D.; Basu, M.K.; Beck, E. TIGRFAMs and Genome Properties in 2013. *Nucleic.*  
510 *Acids. Res.* **2013**, *41*, D387–D395. [PubMed]
- 511 26. Finn, R.D.; Coghill, P.; Eberhardt, R.Y.; Eddy, S.R.; Mistry, J.; Mitchell, A.L.; Potter, S.C.; Punta, M.; Qureshi, M.; Sangrador-  
512 Vegas, A.; Salazar, G.A.; Tate, J.; Bateman, A. The Pfam protein families database: towards a more sustainable future. *Nucleic.*  
513 *Acids. Res.* **2016**, *44*, D279–D285. [PubMed]
- 514 27. Harris, M. A. ; Clark, J.; Ireland, A.; Lomax, J.; Ashburner, M.; Foulger, R.; Eilbeck, K.; Lewis, S.; Marshall, B.; Mungall, C.;  
515 Richter, J.; Rubin, G. M.; Blake, J. A.; Bult, C.; Dolan, M.; Drabkin, H.; Eppig, J.T.; Hill, D.P.; Ni, L.; Ringwald, M. Gene  
516 Ontology Consortium. The Gene Ontology (GO) database and informatics resource. *Nucleic. Acids. Res.* **2004**, *32*, D258–D261.  
517 [PubMed]
- 518 28. Kanehisa, M.; Goto, S. KEGG: kyoto encyclopedia of genes and genomes. *Nucleic. Acids. Res.* **2000**, *28*, 27–30. [PubMed]
- 519 29. O’Leary, N.A.; Wright, M.W.; Brister, J.R.; Ciufu, S.; Haddad, D.; McVeigh, R.; Rajput, B.; Robbertse, B.; Smith-White, B.; Ako-  
520 Adjei, D.; Astashyn, A.; Badretdin, A.; Bao, Y.; Blinkova, O.; Brover, V.; Chetvernin, V.; Choi, J.; Cox, E.; Ermolaeva, O.; Farrell,  
521 C.M.; Goldfarb, T.; Gupta, T.; Haft, D.; Hatcher, E.; Hlavina, W.; Joardar, V.S.; Kodali, V.K.; Li, W.; Maglott, D.; Masterson, P.;  
522 McGarvey, K.M.; Murphy, M.R.; O’Neill, K.; Pujar, S.; Rangwala, S.H.; Rausch, D.; Riddick, L.D.; Schoch, C.; Shkeda, A.; Storz,  
523 S.S.; Sun, H.; Thibaud-Nissen, F.; Tolstoy, I.; Tully, R.E.; Vatsan, A.R.; Wallin, C.; Webb, D.; Wu, W.; Landrum, M.J.; Kimchi,  
524 A ; Tatusova, T.; DiCuccio, M.; Kitts, P.; Murphy, T.D.; Pruitt, K.D. Reference sequence(RefSeq) database at NCBI: current  
525 status, taxonomic expansion, and functional annotation. *Nucleic. Acids. Res.* **2016**, *44*, D733-745. [PubMed]
- 526 30. Galperin, M.Y.; Makarova, K.S.; Wolf, Y.I.; Koonin, E.V. Expanded microbial genome coverage and improved protein family  
527 annotation in the COG database. *Nucleic. Acids. Research.* **2015**, *43*, D261–269. [PubMed]
- 528 31. Parks, D.H.; Chuvochina, M.; Chaumeil, P.A.; Rinke, C.; Mussig, A.J.; Hugenholtz, P. A complete domain-to-species  
529 taxonomy for Bacteria and Archaea. *Nat. Biotechnol.* **2020**, *38*, 1079-1086. [PubMed]
- 530 32. Tindall, B.J.; Rossello-Mora, R.; Busse, H.J.; Ludwig, W.; Kampf, P. Notes on the characterization of prokaryote strains for  
531 taxonomic purposes. *Int. J. Syst. Evol. Microbiol.* **2010**, *60*, 249-266. [PubMed]
- 532 33. Kim, M.; Oh, H.S.; Park, S.C.; Chun, J. Towards a taxonomic coherence between average nucleotide identity and 16S rRNA  
533 gene sequence similarity for species demarcation of prokaryotes. *Int. J. Syst. Evol. Microbiol.* **2014**, *64*, 346-351. [PubMed]
- 534 34. Colston, S.M.; Fullmer, M.S.; Beka, L.; Lamy, B.; Gogarten, J.P.; Graf, J. Bioinformatic genome comparisons for taxonomic and  
535 phylogenetic assignments using *Aeromonas* as a test case. *mBio.* **2014**, *5*, e02136. [PubMed]
- 536 35. Li, E.; Yang, H.; Wang, X.; Wan, L.; Pan, H.; Zhu, D. Whole-genome sequencing and analysis of inosine- producing strain  
537 *Bacillus subtilis* ATCC 13952. *Wei Sheng Wu Xue Bao.* **2015**, *55*, 1560-1567. [PubMed]
- 538 36. Brodl, E.; Csamay, A.; Horn, C.; Niederhauser, J.; Weber, H.; Macheroux, P. The impact of LuxF on light intensity in bacterial  
539 bioluminescence. *J. Photochem. Photobiol. B.* **2020**, *207*, 111881. [PubMed]
- 540 37. Moi, I.M.; Roslan, N.N.; Leow, A.; Ali, M.; Rahman, R.; Rahimpour, A.; Sabri, S. The biology and the importance of  
541 Photobacterium species. *Appl. Microbiol. Biotechnol.* **2017**, *101*, 4371–4385. [PubMed]
- 542 38. Ke, H.M.; Prachumwat, A.; Yu, C.P.; Yang, Y.T.; Promsri, S.; Liu, K.F.; Lo, C.F.; Lu, M.J.; Lai, M.C.; Tsai, I.J.; Li, W.H.  
543 Comparative genomics of *Vibrio campbellii* strains and core species of the *Vibrio Harveyi* clade. *Sci. Rep.* **2017**, *7*, 41394.  
544 [PubMed]
- 545 39. Zhang, B.Y.; Zhu, T.H.; Han, S.; Wang, Y.; Li, S.J.; Qiao, T.M. Whole-genome sequencing and analysis of *Streptomyces*  
546 *sampsonii* KJ40. *Acta. Microbiologica. Sinica.* **2018**, *45*, 805-818.
